# Supplementary material
Source: MDPI journal article supplement (https://www.mdpi.com/1996-1073/12/4/678)
Supplement: s1 [file s1]

# Supplementary Materials: Techno-Economic and Life Cycle Impacts Analysis of Direct Methanation of Glycerol to Bio-Synthetic Natural Gas at a Biodiesel Refinery

Robert White <sup>1,4,\*</sup>, Freddy Segundo Navarro-Pineda <sup>2</sup>, Timothy Cockerill <sup>3,4</sup>, Valerie Dupont <sup>4</sup> and Julio César Sacramento Rivero <sup>2</sup>

<sup>1</sup> Centre for Doctoral Training Bioenergy, Faculty of Engineering, University of Leeds, Leeds LS2 9JT, UK

<sup>2</sup> Faculty of Chemical Engineering, Universidad Autónoma de Yucatán, Mérid 97000, Mexico; fredonava@gmail.com (F.S.N.-P.); julio.sacramento@correo.uady.mx (J.C.S.R.)

<sup>3</sup> Centre for Integrated Energy Research, School of Mechanical Engineering, University of Leeds, Leeds LS2 9JT, UK, T.cockerill@leeds.ac.uk

<sup>4</sup> School of Chemical and Process Engineering, Faculty of Engineering, University of Leeds, Leeds LS2 9JT, UK, V.dupont@leeds.ac.uk

\* Correspondence: pmrww@leeds.ac.uk; Tel.: +(0)113-343-2444

**Table S1.** The following table shows the potential environmental impacts of 1 kg of bio-SNG-based steam (at 10 atm) under different allocation criteria.

| Environmental Category | Unidad                                         | Mass Allocation Criteria | Energy Allocation Criteria | Economic Allocation Criteria | No Allocation          |
|------------------------|------------------------------------------------|--------------------------|----------------------------|------------------------------|------------------------|
| ADP                    | kg Sb <sub>eq</sub>                            | $4.39 \times 10^{-7}$    | $1.69 \times 10^{-7}$      | $3.47 \times 10^{-8}$        | $2.07 \times 10^{-9}$  |
| ADP-FF                 | MJ                                             | 2.08                     | 0.847                      | 0.229                        | $7.89 \times 10^{-2}$  |
| GWP                    | kg CO <sub>2</sub> <sub>eq</sub>               | 0.213                    | $8.57 \times 10^{-2}$      | $2.20 \times 10^{-2}$        | $6.59 \times 10^{-3}$  |
| ODP                    | kg CFC-11 <sub>eq</sub>                        | $2.33 \times 10^{-8}$    | $9.34 \times 10^{-9}$      | $2.37 \times 10^{-9}$        | $6.77 \times 10^{-10}$ |
| HTP                    | kg 1,4-DB <sub>eq</sub>                        | $3.48 \times 10^{-2}$    | $1.50 \times 10^{-2}$      | $5.09 \times 10^{-3}$        | $2.69 \times 10^{-3}$  |
| FWAEP                  | kg 1,4-DB <sub>eq</sub>                        | $3.29 \times 10^{-2}$    | $1.47 \times 10^{-2}$      | $5.64 \times 10^{-3}$        | $3.43 \times 10^{-3}$  |
| MAEP                   | kg 1,4-DB <sub>eq</sub>                        | $1.11 \times 10^2$       | 49.6                       | 18.7                         | 11.2                   |
| TEP                    | kg 1,4-DB <sub>eq</sub>                        | $2.61 \times 10^{-4}$    | $1.05 \times 10^{-4}$      | $2.68 \times 10^{-5}$        | $7.83 \times 10^{-6}$  |
| POP                    | kg C <sub>2</sub> H <sub>4</sub> <sub>eq</sub> | $1.33 \times 10^{-4}$    | $5.25 \times 10^{-5}$      | $1.22 \times 10^{-5}$        | $2.43 \times 10^{-6}$  |
| AP                     | kg SO <sub>2</sub> <sub>eq</sub>               | $8.66 \times 10^{-4}$    | $3.47 \times 10^{-4}$      | $8.84 \times 10^{-5}$        | $2.56 \times 10^{-5}$  |
| EP                     | kg PO <sub>4</sub> <sub>eq</sub>               | $3.91 \times 10^{-4}$    | $1.64 \times 10^{-4}$      | $4.99 \times 10^{-5}$        | $2.23 \times 10^{-5}$  |

**Table S2.** The following table shows the modules used to undertake the calculations regarding the environmental impact assessment using the Simapro v8.4 software.

| Parameter                    | Module                                                            |
|------------------------------|-------------------------------------------------------------------|
| Crude glycerine              | Glycerine {GLO}  market for (US)   Alloc Def, U <sup>a</sup>      |
| Water                        | Tap water {RoW}  market for   Alloc Def, U                        |
| Electricity (medium voltage) | Electricity, medium voltage {US}  market group for   Alloc Def, U |
| Air                          | Assumed to be taken as it is from nature                          |

<sup>a</sup> This module was adapted to the present work. The transport stages involved in this module were excluded and also, the module corresponding to the main raw material (glycerin from esterification of soybean oil), was also changed to reflect the different allocation criteria. The name of that module is glycerin {US}| esterification of soybean oil | Alloc Def, U and the requirements of phosphoric acid were excluded.
